# Supplementary material for: Synthesis of EDOT-containing polythiophenes and their properties in relation to the composition ratio of EDOT
Source: Royal Society of Chemistry journal article supplement (doi:10.1039/c5ra17235g), 2015-01-01
Supplement: c5ra17235g1.pdf [file c5ra17235g1.pdf]

*Supporting Information*

**Synthesis of EDOT-containing polythiophenes and  
their properties in relation to composition ratio of EDOT**

Ichiro Imae\*, Ryo Ogino, Yoshiaki Tsuboi, Tatsunari Goto, Kenji Komaguchi, and Yutaka Harima

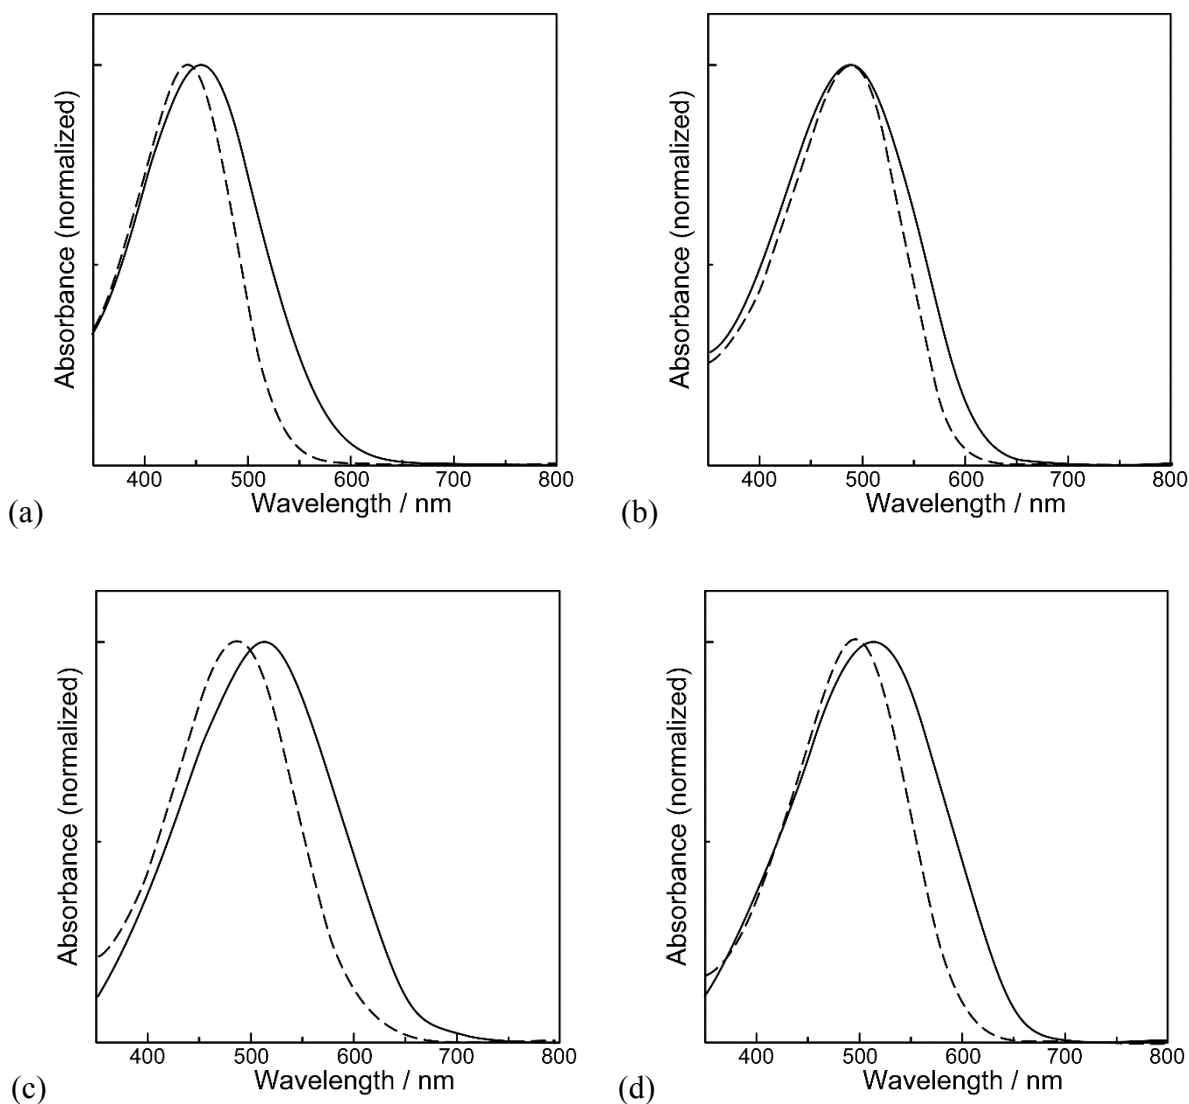

**Fig. 1S** Electronic absorption spectra of (a) P3HT, (b) pETT, (c) pET-C and (d) pET-S (dashed: in *o*-dichlorobenzene, solid: in films).

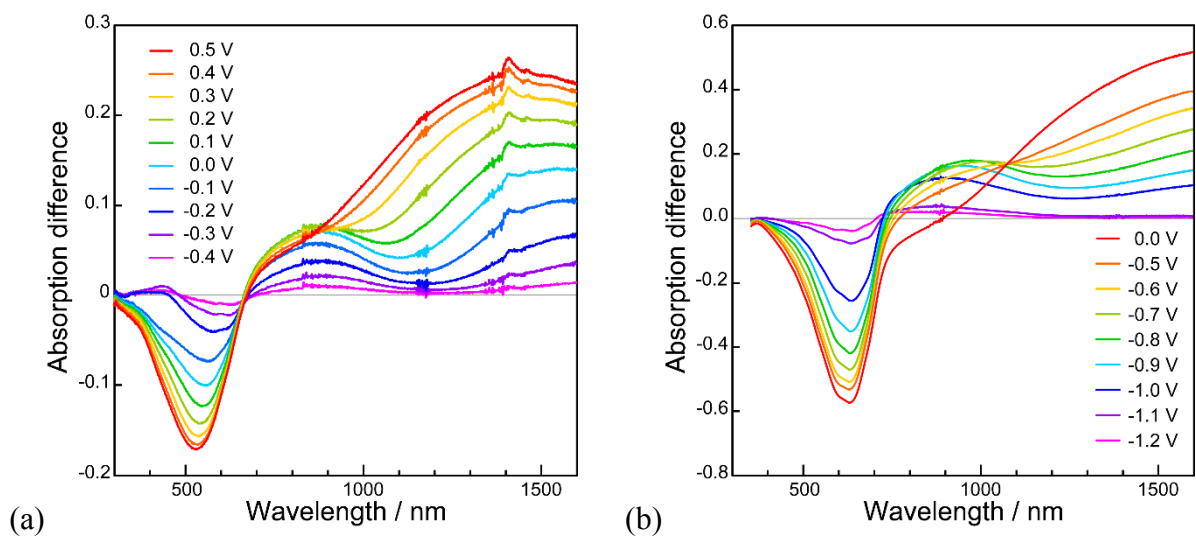

**Fig. 2S** Spectroelectrochemistry of (a) **pET-S** and (b) **PEDOT** films.
